# Supplementary material
Source: PubMed Central journal article supplement (PMC10040428)
Supplement: NIHMS1875724-supplement-1.pdf [file NIHMS1875724-supplement-1.pdf]

## **SUPPLEMENTARY MATERIAL**

**Prognostic significance of immune signatures in endometrial cancer is dictated by the underlying molecular subtypes**

Dessources et al

Supplementary Table 1

Supplementary Figure 1

**Supplementary Table 1.** CIBERSORT and ssGSEA comparison for leukocyte subsets in endometrial carcinomas obtained from The Cancer Genome Atlas.

| ssGSEA                   |          | CIBERSORT              |          |
|--------------------------|----------|------------------------|----------|
| Immune cell              | P-value  | Immune cell            | P-value  |
| T Cells                  | 0.00917  |                        |          |
| Cytotoxic cells          | 0.0337   |                        |          |
| B cells                  | 0.00135  | B mem                  | 0.195    |
|                          |          | B naïve                | 0.963    |
|                          |          | Plasma                 | 0.0132   |
| CD8                      | 0.00106  | CD8                    | 0.000134 |
|                          |          | CD4 Naive              | 0.748    |
|                          |          | CD4 mem.rest           | 0.00164  |
|                          |          | CD4 mem.act            | 1.34E-05 |
| T Helper cells           | 0.0225   |                        |          |
| Tcm                      | 3.66E-05 |                        |          |
| Tem                      | 0.0156   |                        |          |
| Tfh                      | 0.00301  | T Follic.Help          | 2.13E-06 |
| Tgd                      | 0.0676   | Tgd                    | 0.00604  |
| Th1                      | 0.00353  |                        |          |
| Th2                      | 9.32E-05 |                        |          |
| Th17                     | 0.125    |                        |          |
| T reg                    | 3.14E-07 | T reg                  | 0.107    |
| Macrophages              | 0.231    |                        |          |
|                          |          | M0                     | 0.887    |
| APM1                     | 0.0629   | M1                     | 0.000155 |
| APM2                     | 0.121    | M2                     | 0.36     |
| Eosinophils              | 2.47E-08 | Eosinophils            | 0.193    |
| DC                       | 0.000295 |                        |          |
| aDC                      | 1.09E-05 | Dendritic cells active | 3.19E-05 |
| iDC                      | 0.0023   | Dendritic cell resting | 0.0011   |
| pDC                      | 0.0203   |                        |          |
| Mast cells               | 0.00172  | Act mast               | 0.204    |
|                          |          | Rest Mast              | 0.388    |
|                          |          | Mono                   | 0.0278   |
| PNM                      | 0.00226  | PMN                    | 0.0469   |
| NK CD56 bright           | 1.28E-06 |                        |          |
| NK CD56 Dim              | 4.83E-06 |                        |          |
| NK                       | 0.415    | NK active              | 0.734    |
|                          |          | NK resting             | 0.0518   |
| Immunoregulatory markers |          |                        |          |
| Angiogenesis             | 0.00049  |                        |          |
| CTLA-4                   | 8.99E-05 |                        |          |
| PD1                      | 0.000624 |                        |          |
| PD-L1                    | 0.00412  |                        |          |

Kruskal-Wallis one way analysis of variance comparison performed comparing the relative enrichment for the 26 leukocyte subset gene sets by ssGSEA (Bindea et al, Immunity 2013) and the 23 leukocyte subset gene sets by CIBERSORT (Newman et al, Nat Methods 2015) for 232 endometrial carcinomas from The Cancer Genome Atlas (TCGA) (Nature 2013). Gene set describing similar or overlapping leukocyte populations as be found in the same row. Statistical significance was defined as a  $p < 0.05$ .

## Supplementary Figure 1

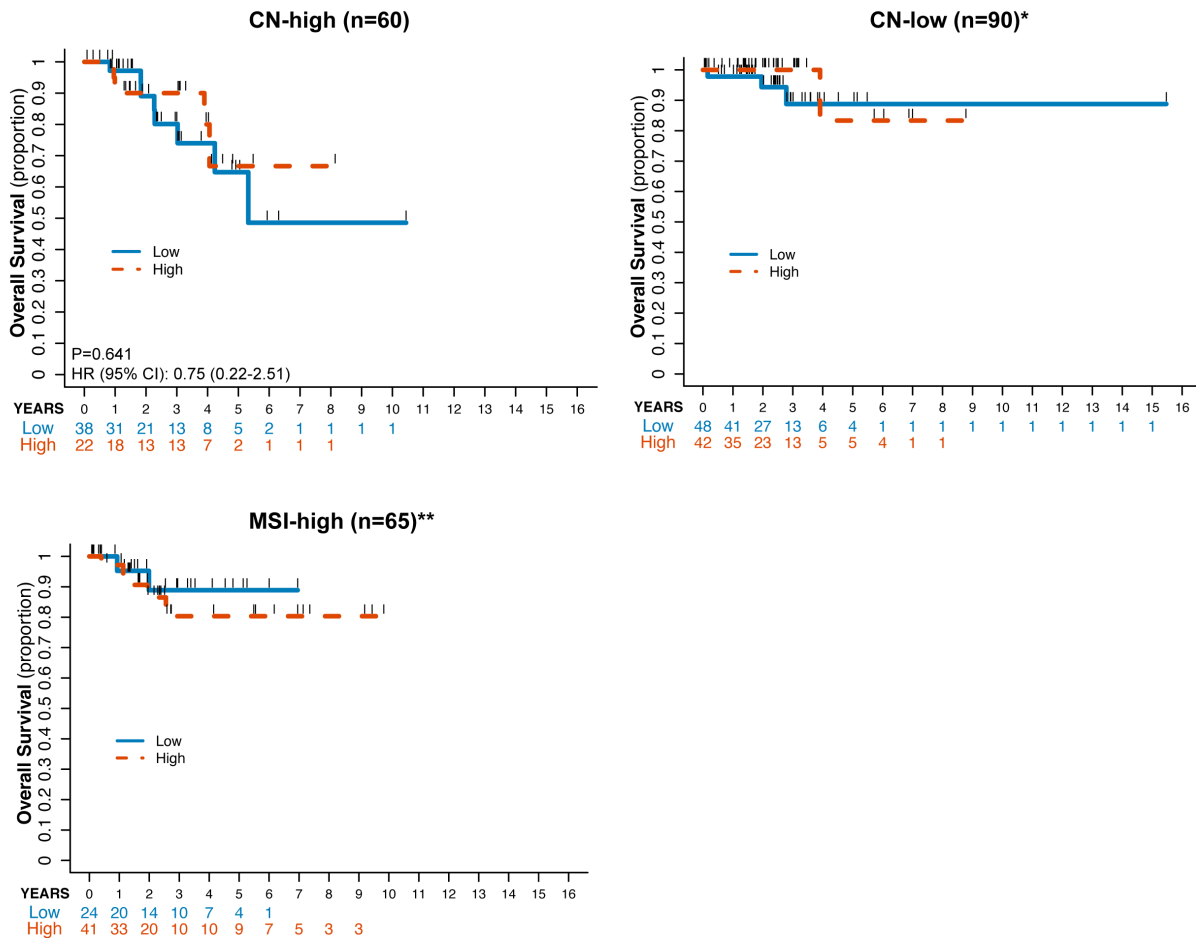

**Supplementary Figure 1: Kaplan-Meier estimate of overall survival for ECs by molecular subtype according to CD8+ infiltration defined by CIBERSORT.**

ECs of CN-high, CN-low, and MSI molecular subtypes were stratified into CD8+ high (blue solid line) or CD8+ low (orange dashed line) defined by their distribution around the median CD8+ infiltration for the entire cohort (n=232) using CIBERSORT. \*Due to only 4 events in OS, no HR and p-value were reported for the CN-low cohort. \*\* Due to only 7 events in OS, no HR and p-value were reported for the MSI-H cohort.
